# Supplementary material for: Preparation of homogeneous lignin nanoparticles by efficient extraction of lignin and modification of its molecular structure using a functional deep eutectic solvent containing γ-valerolactone
Source: Royal Society of Chemistry journal article supplement (doi:10.1039/d3gc04897g), 2024-01-01
Supplement: d3gc04897g1.pdf [file d3gc04897g1.pdf]

**Preparation of homogeneous lignin nanoparticles by efficient extraction of lignin and modification of its molecular structure using a functional deep eutectic solvent containing  $\gamma$ -valerolactone**

*Mingzhu Yao<sup>a</sup>, Baojie Liu<sup>a</sup>, Lina Qin<sup>a</sup>, Zicheng Du<sup>a</sup>, Zenglin Wang<sup>a</sup>, Chengrong Qin<sup>a\*</sup>, Chen Liang<sup>a</sup>, Caoxing Huang<sup>b</sup>, Shuangquan Yao<sup>a\*</sup>*

*<sup>a</sup>Guangxi Key Laboratory of Clean Pulp & Papermaking and Pollution Control, School of Light Industrial and Food Engineering, Guangxi University, Nanning, 530004, PR China*

*<sup>b</sup>Jiangsu Co-Innovation Center of Efficient Processing and Utilization of Forest Resources, Nanjing Forestry University, Nanjing 210037, PR China*

*\*Corresponding author: qinchengrong@gxu.edu.cn (Chengrong Qin)*

*yaoshuangquan@gxu.edu.cn (Shuangquan Yao)*

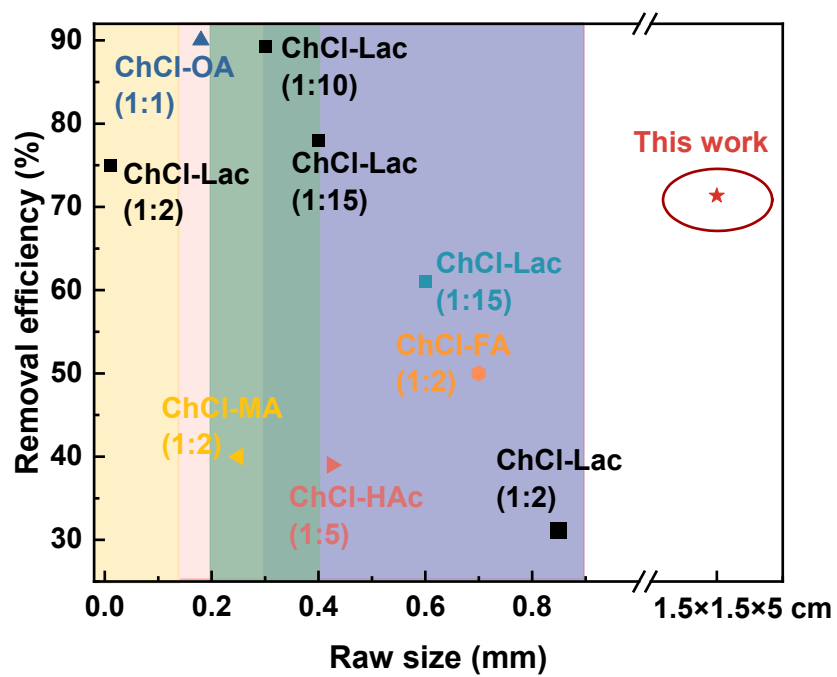

Fig. S1 Comparison of separation efficiency between this work (ChCl-5Saa/GVL) and previously reported green advance DES systems.

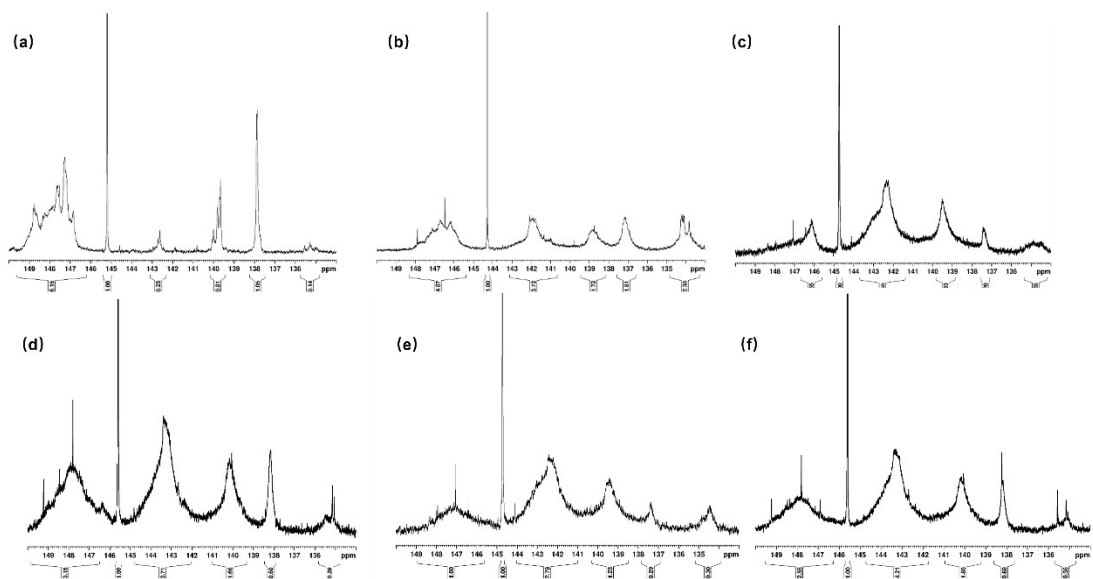

Fig. S2  $^{31}\text{P}$  NMR spectra and integrals (a, CEL; b, Alkali lignin; c, Regenerated lignin after ChCl-Lac treatment; d, Regenerated lignin after ChCl-5Saa/GVL treatment; e, residual lignin after ChCl-Lac treatment; f, residual lignin after ChCl-5Saa/GVL treatment).

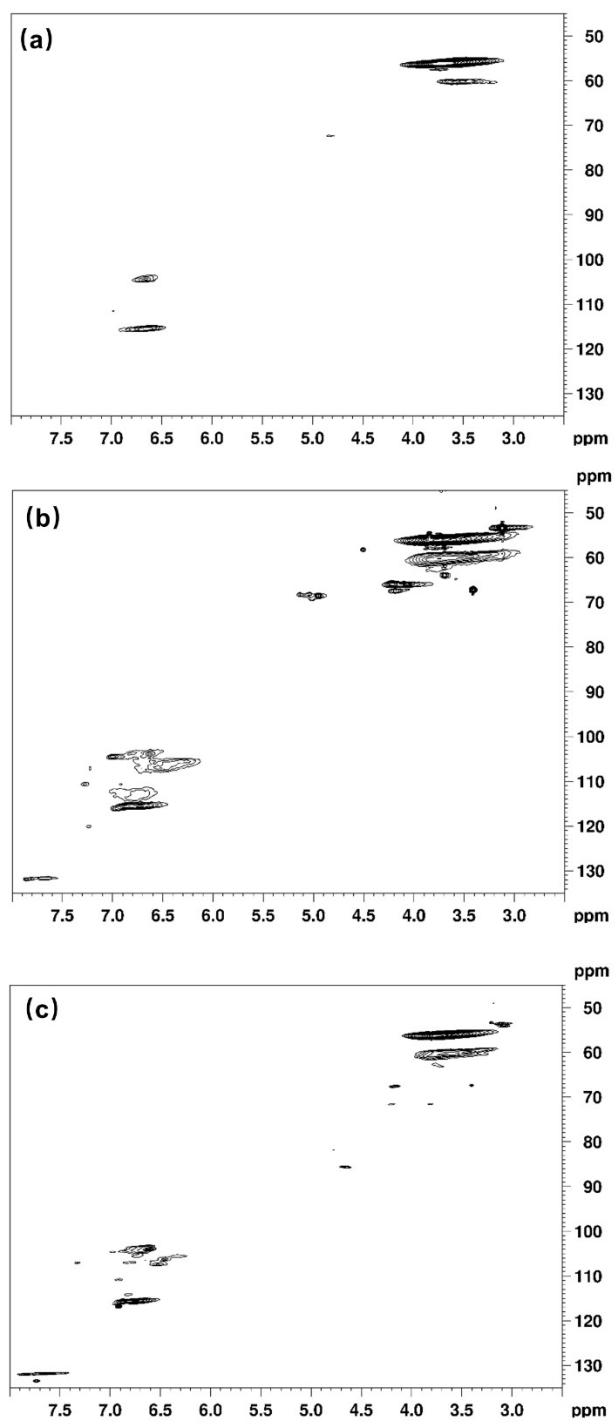

Fig. S3 Unaltered 2D-HSQC full-spectrum spectra of regenerated lignin treated with different DES systems (a, Alkali lignin; b, ChCl-Lac-Lignin; c, ChCl-5Saa/GVL-Lignin).

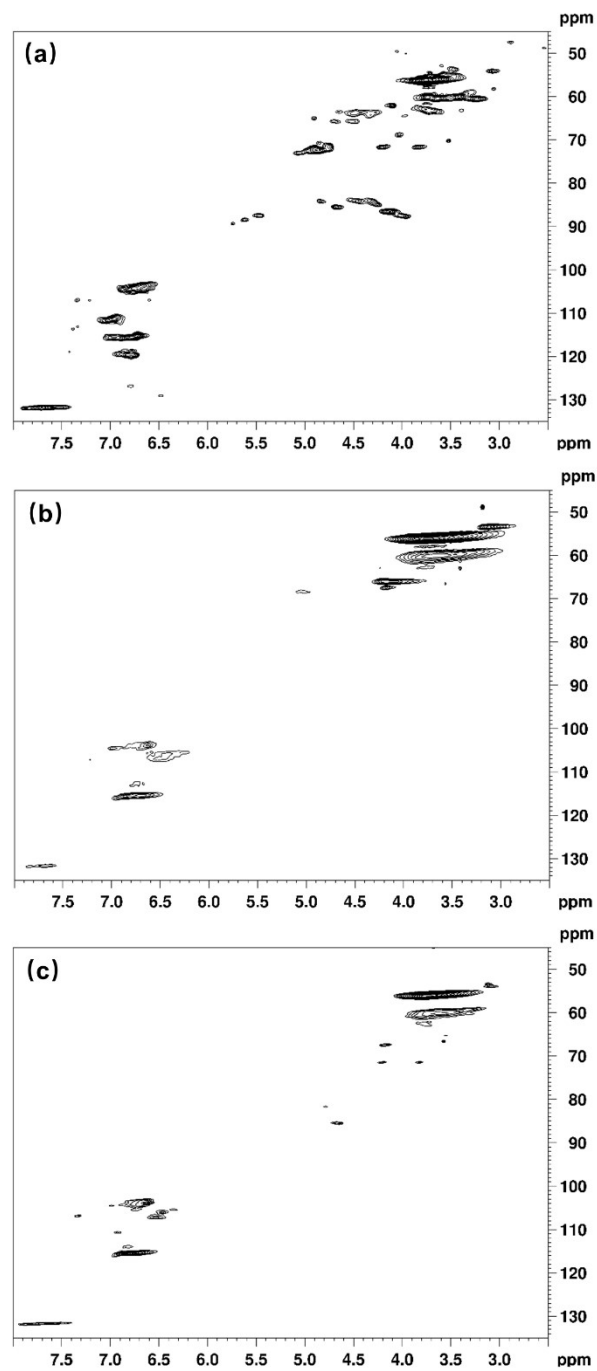

Fig. S4 Unaltered 2D-HSQC full-spectrum spectra of residual lignin in poplar before and after DES treatment (a, CEL; b, residual lignin after ChCl-Lac treatment; c, residual lignin after ChCl-5Saa/GVL treatment).

Table S1 Comparison of separation process conditions between this work (ChCl-5Saa/GVL) and previously reported green advance DES systems.

| DESs (HBA:HBD)             | Molar ratio | Feedstock                                                 | Condition             | Lignin removal efficiency | References |
|----------------------------|-------------|-----------------------------------------------------------|-----------------------|---------------------------|------------|
| ChCl-Lac                   | 1:2         | Poplar powder<br>(ball mill 1 h)                          | 110 °C, 9 h,<br>10%   | 75%                       | 19         |
|                            | 1:2         | Poplar powder<br>(0.18 – 0.85 mm)                         | 110 °C, 1.5<br>h, 10% | 31.1%                     | 37         |
|                            | 1:10        | Poplar powder<br>(0.18 – 0.85 mm)                         | 130 °C, 1.5<br>h, 10% | 89.3%                     | 37         |
|                            | 1:15        | Poplar powder<br>(0.25 – 0.4mm)                           | 145 °C, 6 h           | 78%                       | 38         |
|                            | 1:15        | oil palm empty fruit<br>bunch (EFB)<br>(0.250 – 0.707 mm) | 120 °C, 8 h,<br>10%   | 61%                       | 20         |
| ChCl-OA                    | 1:1         | Poplar powder<br>(0.18mm)                                 | 110 °C, 9 h,<br>5%    | 90%                       | 39         |
| ChCl-FA                    | 1:2         | EFB<br>(0.250 – 0.707 mm)                                 | 120 °C, 8 h,<br>10%   | 50%                       | 40         |
| ChCl-HAc                   | 1:5         | EFB<br>(0.250 – 0.707 mm)                                 | 120 °C, 8 h,<br>10%   | 39%                       | 20         |
| ChCl-MA                    | 1:2         | EFB<br>(0.250 – 0.707 mm)                                 | 120 °C, 8 h,<br>10%   | 40%                       | 20         |
| This work<br>ChCl-5Saa/GVL | 1:4:15      | Poplar stick<br>(1.5×1.5×5 cm)                            | 120 °C, 3 h,<br>10%   | 71.35%                    |            |

ChCl-Lac: The choline chloride- lactic acid systems; ChCl-OA: The choline chloride- oxalic acid systems; ChCl-FA: The choline chloride- formic acid systems; ChCl-Hac: The choline chloride- acetic acid systems; ChCl-MA: The choline chloride- malic acid systems.

Table S2 Recycling performance of ChCl-5Saa/GVL treatment.

| Cycles                 | Cellulose retention (%) | Lignin separation efficiency (%) | Hemicellulose separation efficiency (%) |
|------------------------|-------------------------|----------------------------------|-----------------------------------------|
| 0 (First pretreatment) | 92.87                   | 71.35                            | 95.86                                   |
| 1                      | 93.45                   | 70.86                            | 93.29                                   |
| 2                      | 93.26                   | 70.35                            | 94.05                                   |
| 3                      | 94.43                   | 69.87                            | 93.86                                   |
| 4                      | 94.13                   | 69.13                            | 93.42                                   |
| 5                      | 94.02                   | 68.85                            | 92.87                                   |

## NMR of experimental methods:

### 1. <sup>31</sup>P NMR of quantification of OH groups

The OH groups of lignin were calculated by integrating the signal peaks by <sup>31</sup>P NMR. Cyclohexanol was accurately formulated with pyridine and chloroform solvents, and chromium acetylpyruvate was used as a relaxation reagent. The signals of the internal standard cyclohexanol were used as a reference to calculate the content of various OH groups of lignin. Equation (1) was shown below:

$$\text{Content OH} = (\rho \times V \times 10^{-6} / M \times (A_2 / A_1)) / m \times 1000 \quad (1)$$

where  $A_1$  is the integral area of the hydroxyl group in cyclohexanol.  $A_2$  is the integral area of the hydroxyl group in the lignin structure. And  $m$  is the mass of the lignin sample (g).  $V$  is the volume of cyclohexanol added to the lignin ( $\mu\text{L}$ ).  $M$  the molar mass of cyclohexanol ( $\text{g} \cdot \text{mol}^{-1}$ ).

### 2. 2D HSQC of quantification of lignin inter-unit linkages

The NMR resolved lignin linkages and contents of lignin units were calculated based on the integrals of  $\alpha$ -<sup>1</sup>H/<sup>13</sup>C correlation peaks verses the integrals of the aromatic-<sup>1</sup>H/<sup>13</sup>C correlation peaks in the 2D-HSQC spectra, equation (2)–(5) as follows:

$$C_9 = 1/2 (I_{S_{2,6}} + I_{S'_{2,6}}) + G_2 \quad (2)$$

$$\text{Content } \beta\text{-O-4} = I_A / C_9 \times 100\% \quad (3)$$

$$\text{Content } \beta\text{-}\beta = I_B / C_9 \times 100\% \quad (4)$$

$$\text{Content } \beta\text{-5} = 0.5 \times I_C / C_9 \times 100\% \quad (5)$$
